# Supplementary material
Source: PubMed Central journal article supplement (PMC6931915)
Supplement: Supp_Fig1.pdf [file Supp_Fig1.pdf]

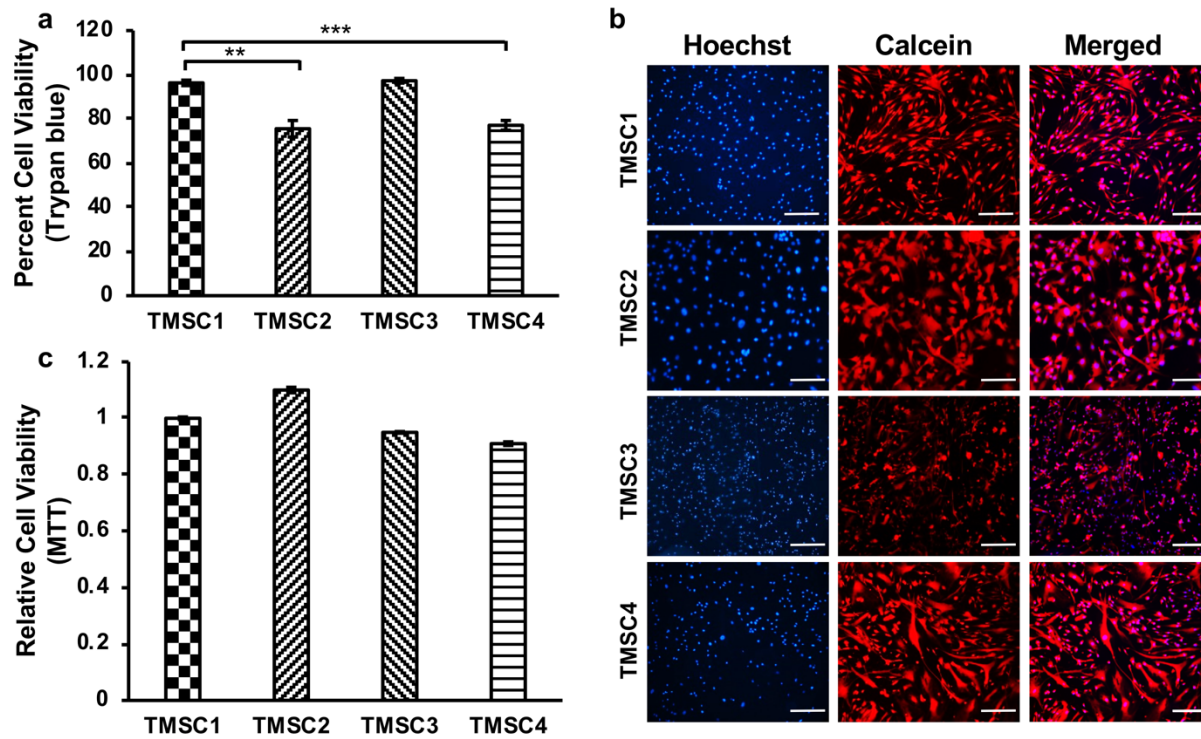

**Supplementary Figure S1. Assessment of cell viability.** **a.** Trypan blue exclusion assay showing cell viability immediately post-thaw, **b.** Calcein/Hoechst 33342 staining for assessment of cell viability in all four TMSCs. **c.** Bar diagram showing comparative cell viability in different TMSCs by MTT assay. Scale bars, 100 $\mu$ m; 50 $\mu$ m for TMSC2. \*\* $p < 0.001$ , \*\*\* $p < 0.0001$ .
