# Supplementary material
Source: PubMed Central journal article supplement (PMC6931915)
Supplement: Supp_Fig2.pdf [file Supp_Fig2.pdf]

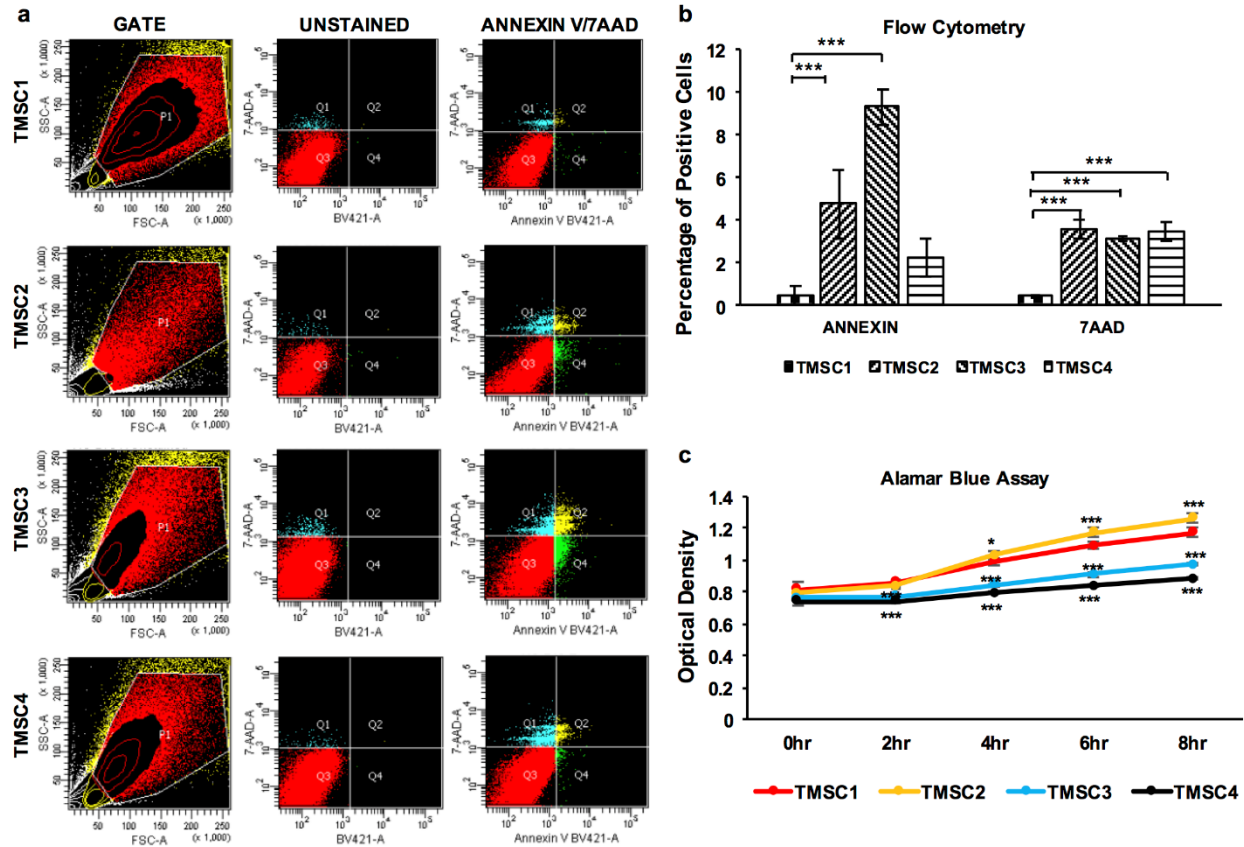

**Supplementary Figure S2. Apoptosis analysis in cryo-TMSCs.** **a.** Dot plot showing positivity for Annexin V and 7-AAD in different TMSCs, **b.** Bar diagram showing percentage of positive cells for Annexin V and 7-AAD in different TMSC populations, **c.** Comparative cell proliferation among different TMSCs evaluated by Alamar Blue cell proliferation assay. Statistical comparison was made to TMSC1. \* $p < 0.05$ , \*\* $p < 0.001$ , \*\*\* $p < 0.0001$ .
