# Supplementary material
Source: PubMed Central journal article supplement (PMC6931915)
Supplement: Supp_Fig3.pdf [file Supp_Fig3.pdf]

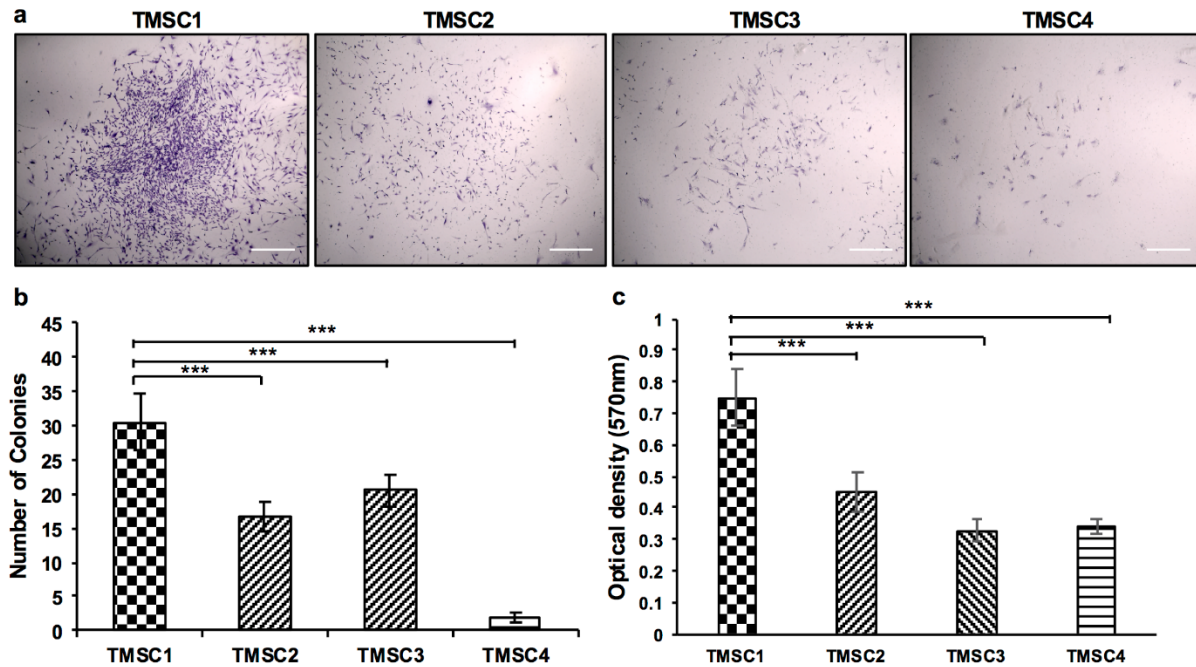

**Supplementary Figure S3. Assessment of colony forming efficiency.** **a.** Crystal violet staining for colonies formed by different TMSCs, **b.** comparison of colony count formed by different TMSCs, **c.** quantification of optical density from stained colonies in different TMSCs. Scale bars, 500 $\mu$ m. \*\*\* $p$ <0.0001.
