# Supplementary material
Source: PubMed Central journal article supplement (PMC6931915)
Supplement: Supp_Table1.pdf [file Supp_Table1.pdf]

**Title: Regenerative Potential of Human Trabecular Meshwork Stem Cells After Long-Term Cryopreservation**

Ajay Kumar<sup>1</sup>, Yi Xu<sup>1</sup>, Yiqin Du<sup>1,2,3\*</sup>

**Affiliations**

1. Department of Ophthalmology, University of Pittsburgh, Pittsburgh, PA 15213
2. Department of Developmental Biology, University of Pittsburgh, Pittsburgh, PA 15213
3. McGowan Institute for Regenerative Medicine, University of Pittsburgh, Pittsburgh, PA 15213

**\*Correspondence address:**

Dr. Yiqin Du, 910 Eye and Ear Institute, 203 Lothrop St, Pittsburgh, PA 15213.

Tel: 412-802-8437, Email: [duy@upmc.edu](mailto:duy@upmc.edu)

**Supplementary Table S1.** Details of TMSCs derived from different donors.

| <b>SR. NO.</b> | <b>TMSC</b> | <b>PASSAGE NUMBER</b> | <b>AGE OF DONOR</b> | <b>CRYOPRESERVATION DATE</b> |
|----------------|-------------|-----------------------|---------------------|------------------------------|
| 1              | TMSC1       | 1                     | 51                  | 12/23/2010                   |
| 2              | TMSC2       | 3                     | 48                  | 01/27/2010                   |
| 3              | TMSC3       | 3                     | 17                  | 01/31/2010                   |
| 4              | TMSC4       | 2                     | 58                  | 01/18/2011                   |
