# Supplementary material
Source: PubMed Central journal article supplement (PMC6931915)
Supplement: Supp_Table2.pdf [file Supp_Table2.pdf]

**Supplementary Table S2.** Details of the antibodies used in the study.

| <b>ANTIBODY- FLUOROCHROME</b>         | <b>Company</b>                    |
|---------------------------------------|-----------------------------------|
| CD90- BV510                           | BD Bioscience, San Jose, CA       |
| CD73- PE/Cy7                          | Biolegend, San Diego, CA          |
| CD105- AF647                          | Biolegend, San Diego, CA          |
| CD166- FITC                           | MBL, Woburn, MA                   |
| NOTCH1- PE                            | BD Pharmingen™, San Diego, CA     |
| OCT4-FITC                             | Bioscience Inc. San Diego, CA     |
| SSEA4- AF488                          | eBioscience Inc., Coraopolis, PA  |
| STRO1- APC                            | Biolegend, San Diego, CA          |
| CD34- FITC                            | Millipore, Burlington, MA         |
| CD45- PE                              | BD Bioscience, San Jose, CA       |
| Isotype-FITC                          | Bioscience Inc. San Diego, CA     |
| Isotype-PE                            | BD Pharmingen™, San Diego, CA     |
| Isotype-PE/CY7                        | Biolegend, San Diego, CA          |
| Isotype-APC                           | Bioscience Inc. San Diego, CA     |
| $\beta$ -III Tubulin                  | Invitrogen, Carlsbad, CA          |
| Neurofilament                         | EMD Millipore, Burlington, MA     |
| Nestin                                | EMD Millipore, Burlington, MA     |
| HNK1-PE/CY7                           | Invitrogen, Carlsbad, CA          |
| CHI3L1                                | R&D Systems, Minneapolis, MN      |
| AQP1                                  | Santa Cruz Bioscience, Dallas, TX |
| Myocilin                              | Santa Cruz Bioscience Dallas, TX  |
| Donkey-anti-goat Alexafluor 488 IgG   | Life Technologies, Eugene, OR     |
| Donkey-anti-rabbit Alexafluor 555 IgG | Life Technologies, Eugene, OR     |
| Donkey-anti-mouse Alexafluor 647 IgG  | Life Technologies, Eugene, OR     |
